# Supplementary material
Source: PubMed Central journal article supplement (PMC4703035)
Supplement: NIHMS743446-supplement-1.pdf [file NIHMS743446-supplement-1.pdf]

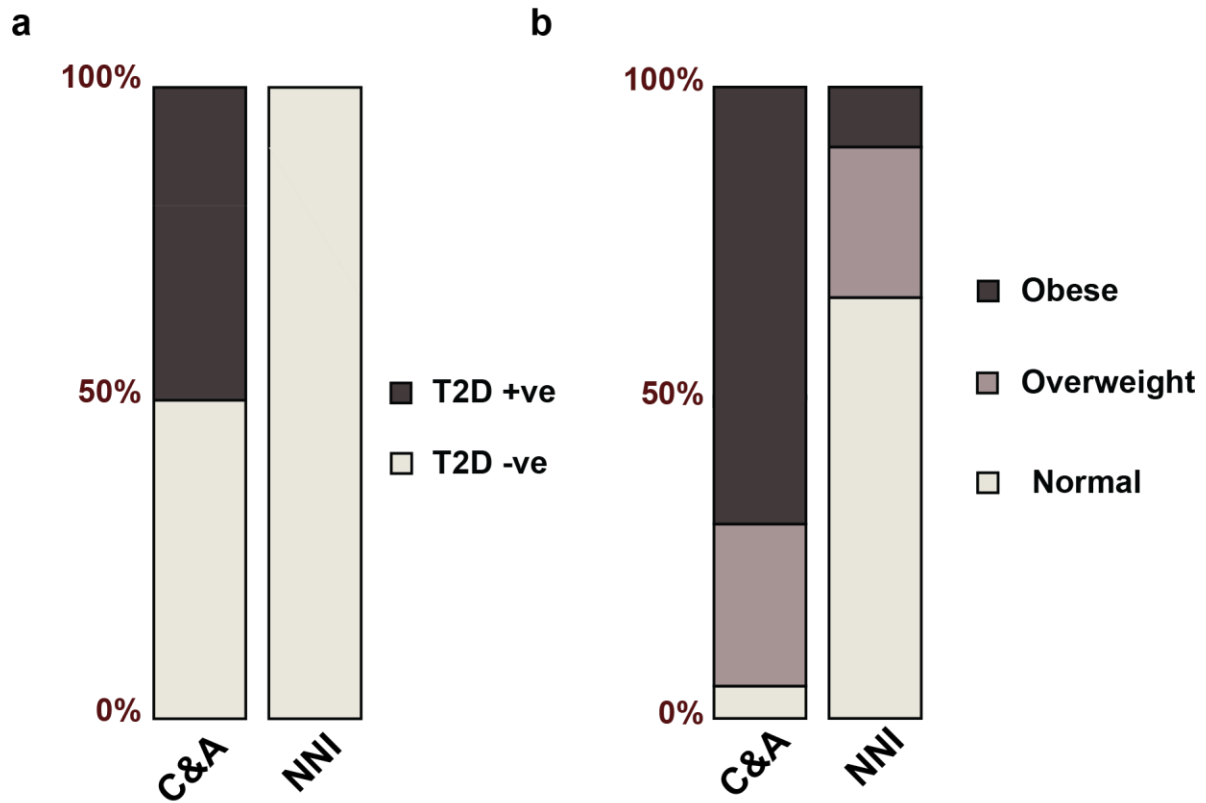

**Figure S1, related to Figure 1. Prevalence of (A) Self-reported T2D and (B) BMI categories (calculated from Height, Weight measurements), among the C&A and NNI participants.**

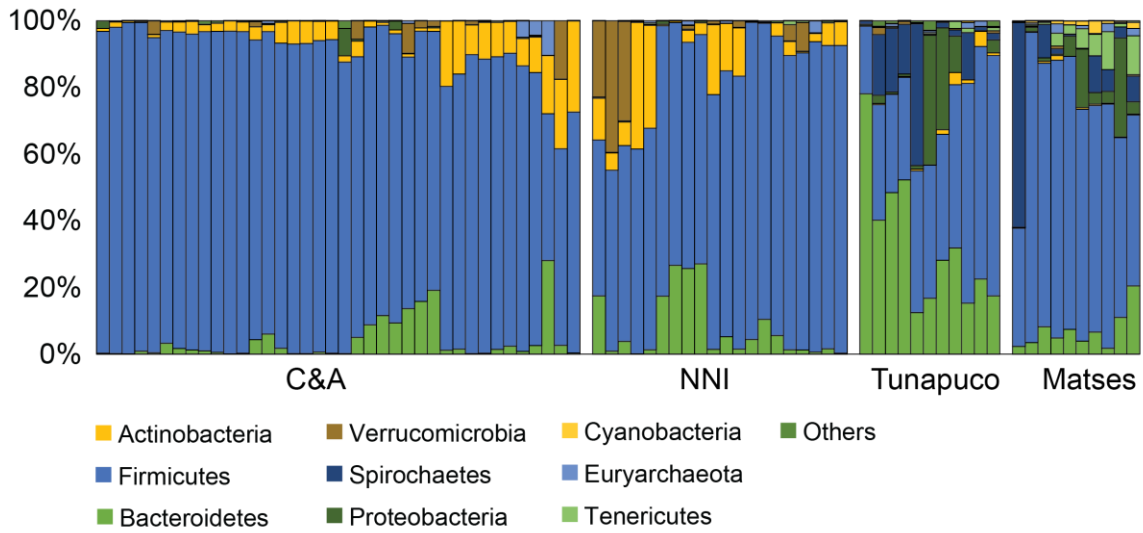

**Figure S2, related to Figure 2. Phylum level relative abundance plots.** Comparison of gut microbiome taxonomic profiles at the Phylum level, between the C&A participants, and previously published NNI and native South American populations [S1].

**Table S1, related to Figure 1. Sample metadata and 16S rRNA read statistics for the C&A participants.** Metadata and read statistics for the NNI participants is available from [S1].

| Sample | Sex | Age (yrs) | BMI  | Antibiotics | Cigarettes | T2D | Soda     | No: of Seqs |
|--------|-----|-----------|------|-------------|------------|-----|----------|-------------|
| CA01   | M   | 55        | 31   | Y           | Y          | N   | Y        | 54,539      |
| CA02   | F   | 55        | 40.8 | N           | N          | Y   | Y        | 43,018      |
| CA03   | F   | 27        | 35   | N           | Y          | N   | Y        | 41,243      |
| CA04   | M   | 30        | 33.1 | N           | N          | N   | Y        | 38,605      |
| CA05   | F   | 84        | 27.3 | Y           | N          | Y   | N        | 36,928      |
| CA06   | F   | 51        | 44.2 | N           | Y          | N   | Y        | 46,416      |
| CA08   | F   | 33        | 38   | N           | N          | N   | Y        | 43,928      |
| CA09   | F   | 29        | 48.3 | N           | Y          | N   | Y        | 42,631      |
| CA12   | F   | 43        | 32.3 | N           | N          | Y   | DietSoda | 30,708      |
| CA13   | F   | 20        | 27.3 | Y           | Y          | N   | Y        | 31,807      |
| CA14   | M   | 21        | 25.2 | N           | Y          | N   | Y        | 23,262      |
| CA15   | F   | 34        | 28.2 | N           | N          | Y   | DietSoda | 22,106      |
| CA16   | M   | 45        | 39.1 | N           | N          | Y   | DietSoda | 35,301      |
| CA17   | M   | 39        | 40.3 | N           | Y          | Y   | DietSoda | 34,959      |
| CA18   | M   | 69        | 36.3 | Y           | Y          | N   | Y        | 30,756      |
| CA19   | F   | 68        | 40.3 | N           | N          | N   | Y        | 43,783      |
| CA20   | F   | 54        | 26.1 | N           | N          | N   | Y        | 29,947      |
| CA21   | F   | 65        | 40.7 | N           | N          | Y   | Y        | 45,291      |
| CA22   | F   | 41        | 26.2 | N           | N          | Y   | Y        | 43,989      |
| CA23   | F   | 65        | 24.7 | N           | N          | Y   | DietSoda | 42,413      |
| CA24   | M   | 55        | 31.8 | Y           | Y          | N   | N        | 34,551      |
| CA25   | M   | 65        | 30   | N           | N          | Y   | Y        | 39,595      |
| CA26   | M   | 56        | 42.1 | Y           | N          | Y   | Y        | 34,310      |
| CA27   | M   | 55        | 44   | N           | N          | Y   | Y        | 48,032      |
| CA28   | F   | 55        | 36.3 | N           | Y          | Y   | Y        | 38,316      |
| CA29   | F   | 45        | 24.9 | Y           | Y          | N   | Y        | 34,788      |
| CA30   | M   | 55        | 37.4 | N           | N          | Y   | Y        | 34,210      |
| CA31   | M   | 62        | 30   | Y           | N          | N   | Y        | 47,325      |
| CA32   | F   | 44        | 43.7 | Y           | Y          | Y   | Y        | 30,709      |

**Table S1. (cont.)**

| Sample | Sex | Age (yrs) | BMI  | Antibiotics | Cigarettes | T2D | Soda     | No: of Seqs |
|--------|-----|-----------|------|-------------|------------|-----|----------|-------------|
| CA33   | F   | 69        | 35   | N           | N          | Y   | DietSoda | 27,232      |
| CA34   | F   | 44        | 33.4 | Y           | N          | N   | DietSoda | 46,388      |
| CA35   | F   | 49        | 28   | Y           | Y          | N   | Y        | 41,187      |
| CA36   | M   | 66        | 29.6 | N           | N          | Y   | Y        | 38,130      |
| CA37   | F   | 50        | 32.6 | N           | N          | Y   | Y        | 46,855      |
| CA38   | F   | 29        | 47.4 | N           | N          | N   | DietSoda | 43,219      |
| CA39   | F   | 29        | 31.9 | Y           | Y          | N   | Y        | 29,277      |
| CA40   | M   | 55        | 35.1 | Y           | N          | Y   | DietSoda | 40,530      |
| CA41   | F   | 55        | 36.1 | N           | Y          | N   | N        | 35,989      |

**Table S2, related to Figure 1. Diet summaries generated from a three day food journal obtained from the C&A participants. (See spreadsheet.)**

**Table S3, related to Figure 3. Assembly and annotation statistics for the C&A and NNI shotgun metagenomic datasets. NNI shotgun metagenomic data was originally generated as part of Obregon-Tito, A. J. et al. 2015 [S1]. (See spreadsheet.)**

**Table S4, related to Figure 4. Filtered metabolite table for C&A and NNI individuals. Missing values are depicted as 'NA'. Samples with \* correspond to children, and were excluded from comparative analyses. (See spreadsheet.)**

**Table S5, related to Figure 4. Diet and metabolite correlation analysis within the C&A individuals**

| Variable                             | Pathway                               | Metabolite Name        | <i>P</i> | FDR Adjusted <i>P</i> |
|--------------------------------------|---------------------------------------|------------------------|----------|-----------------------|
| Number of Beverages                  | Phenylalanine and Tyrosine Metabolism | 3-hydroxyphenylacetate | 0.000498 | 0.099545              |
|                                      | Dipeptide                             | histidylproline        | 0.000533 | 0.099545              |
|                                      | Lysine Metabolism                     | 2-aminoadipate         | 0.000578 | 0.099545              |
| Count Milk Consumption               | Secondary Bile Acid Metabolism        | lithocholate           | 0.000122 | 0.063122              |
| Percent meals with processed Protein | Arginine and Proline Metabolism       | N-acetylproline        | 0.000139 | 0.07193               |
| If Alcohol consumed                  | Fatty Acid Metabolism                 | 2-aminooctanoate       | 3.66E-05 | 0.011097              |
|                                      | Fatty Acid Metabolism                 | 2-aminoheptanoate      | 4.29E-05 | 0.011097              |
| If Caffeinated drinks consumed       | Primary Bile Acid Metabolism          | glycochenodeoxycholate | 2.87E-05 | 0.007427              |
|                                      | Xenobiotics                           | metoprolol             | 2.87E-05 | 0.007427              |

**Table S6, related to Figure 4. Metabolite-taxa correlation analysis within the C&A individuals (See spreadsheet.)**

### Supplemental References

**S1.** Obregon-Tito, A.J., Tito, R.Y., Metcalf, J., Sankaranarayanan, K., Clemente, J.C., Ursell, L.K., Zech Xu, Z., Van Treuren, W., Knight, R., Gaffney, P.M., et al. (2015). Subsistence strategies in traditional societies distinguish gut microbiomes. *Nat Commun* 6.
